# Supplementary material
Source: PubMed Central journal article supplement (PMC2741263)
Supplement: 0907043106_0907043106SI.pdf [file 0907043106_0907043106SI.pdf]

# Supporting Information

Alaux et al 10.1073/pnas.0907043106

## SI Text

**Soldier Trap.** To obtain soldier bees, a net trap fitting the dimensions of the beehive with 4 triangular pieces of white wood (two  $55.5 \times 90$  cm and two  $45.5 \times 90$  cm) was placed on top of the opened hive. After stimulation, the trap was removed and the hive-top closed to prevent the soldiers inside it from escaping. The trap was then placed inside a freezer at  $-18^\circ\text{C}$  for 5 min.

**cis-Regulatory Analysis. Determining genes targeted by a transcription factor motif.** We masked exons (of adjacent genes) and short tandem repeats of period  $\leq 5$  bp [Tandem Repeat Finder (1), command-line arguments 2 3 5 80 10 25 5 -m -d] present in the promoter, and removed all masked positions, thus obtaining promoters of variable lengths ( $\leq 5$  Kbp). We “scanned” each resulting promoter with a sliding window of 500-bp length, in shifts of 250 bp. Each window was scored for presence of the motif by using the Hidden Markov Model-based approach used in ref. 2. This raw score was converted to an empirical  $P$  value based on raw scores of randomly generated windows of the same length and guanine-cytosine content. Each promoter was thus associated with a list of “score  $P$  values” of varying sizes because the masked promoters are of varying lengths and are covered by varying number of 500-bp windows. Let  $k$  be the number of window  $P$  values associated with a gene’s promoter, and let  $\beta$  be a significance threshold (e.g., 0.05) at which we wish to associate the gene with the motif. We computed  $\alpha = 1 - (1 - \beta)^{1/k}$  and used this as a threshold on the window-score  $P$  value. If any window has score  $P$  value below this threshold  $\alpha$ , then the corresponding promoter (and gene) is designated as a target of the motif.

**Associating motifs with gene sets.** Each motif was tested for association with differentially regulated gene sets in each experiment, as follows: Let  $U_T$  and  $D_T$  be the sets of genes up- and down-regulated in experiment  $T$  (i.e., alarm pheromone, old, or soldier). Each set was partitioned into genes that are targeted by the motif (as determined above, with  $\beta = 0.01$ ) and genes that are not. A Fisher exact test was performed on the  $2 \times 2$  contingency table (up vs. down, motif target vs. nontarget), and the 1-tailed  $P$  value was the statistical measure of association between the gene set  $U_T$  and the motif. By repeating the same test for the  $2 \times 2$  contingency table: (down vs. up, motif target vs. nontarget), we obtained a  $P$  value for the association between the gene set  $D_T$  and the motif.

**Motifs associated consistently with genes influenced by heredity and environment.** A motif was tested for consistent association with up-regulated gene sets from all three experiments as follows. (The same procedure was repeated with down-regulated gene sets.) Let  $P_1, P_2,$  and  $P_3$  be the 1-tailed  $P$  values of association of the motif with the up-regulated gene sets in the three experiments, respectively. We considered the combined measure

$$P_c = 1 - (1 - P_1) (1 - P_2) (1 - P_3).$$

We denote this random variable as  $P_c$  and its observed value as  $P_c^{(o)}$ . Under the null hypothesis that each of  $P_1, P_2, P_3$  is uniformly distributed, we computed the probability  $\pi_c$  that the combined measure  $P_c$  has a value less than or equal to the observed value  $P_c^{(o)}$ , i.e., a 1-tailed  $P$  value for the combined measure  $P_c$ , as follows:

$$\pi_c(x) = \Pr(P_c \leq x) = \Pr\left(\prod_j (1 - P_j) \geq 1 - x\right)$$

$$\begin{aligned} &= 1 - \Pr\left(\prod_j (1 - P_j) \leq 1 - x\right) \\ &= 1 - (1 - x) \sum_{i=0}^2 (-1)^i \frac{(\ln(1 - x))^i}{i!}, \end{aligned}$$

where the last step is due to the fact that  $1 - P_j$  is uniformly distributed in  $[0,1]$  under the null hypothesis.

The random variable  $P_c$  has the desirable property that it is low only if each of  $P_1, P_2, P_3$  is low, and thus captures consistent motif association (low  $P$  value) in all three experiments. (Contrast this with the product of the three  $P_j$ 's, which may be low even if one or two of the  $P_j$ 's is close to 1.) However, the  $P$  value  $\pi_c$  computed above corresponds to the strong null hypothesis that every individual  $P_j$  is uniformly distributed. We therefore empirically estimated the appropriate thresholds to use for this  $P$  value, as described below.

**Multiple hypothesis correction.** We simulated random gene sets of the same size as the original gene sets in each experiment, obtained the  $\pi_c$  for each motif, calculated how many motifs have a  $\pi_c$  below a specific threshold  $\tau$ , and computed an average of this number over 1,000 independent simulations. This is the empirical expectation of the number of tests with  $\pi_c$  below  $\tau$ , and was used to estimate a false discovery rate (FDR) corresponding to each  $\pi_c(P_c^{(o)})$  in the tests with the original gene sets. Only motifs with estimated FDR  $< 0.001$  are reported in Table 5.

**Extreme value distribution.** We considered the minimum  $\pi_c(P_c^{(o)})$  over all motifs, representing the extent of the strongest consistent motif association. We then computed the corresponding minimum value from each of the 1,000 random simulations described above, and the histogram thus obtained provides us with an estimate of the Extreme Value Distribution of  $\pi_c(P_c^{(o)})$ . This allowed us to estimate an empirical  $P$  value for the minimum  $\pi_c(P_c^{(o)})$ .

## mRNA Quantification by Real-Time Quantitative RT-PCR (qRT-PCR).

We determined whether alarm pheromone exposure induces an up-regulation of the transcription factor *c-Jun* in antennal lobes (ALs) (Fig. S1). Seven control and pheromone-exposed workers per colony were analyzed. We also verified the expression levels of 4 genes (*Uvop*, *Gβe*, *trp*, and *TpnCI*) in whole brains of bees from two Africanized honey bee (AHB) colonies compared with bees from two European honey bee (EHB) colonies (Fig. S3). Five to seven workers (mainly AHB workers) per colony were analyzed. Because the expression levels of the tested genes did not differ significantly between the two AHB colonies and between the two EHB colonies (1-tailed permutation test,  $P = 0.18$  for each test), results were pooled for analysis.

Whole brains and ALs were dissected, frozen, and then homogenized in TRIzol (Invitrogen Life Technologies) before extracting RNA with the Qiagen RNeasy kit for total RNA with on-column DNase I treatment (Qiagen). Forty nanograms from the two ALs and 200 ng from whole brains were reverse-transcribed with random hexamers by using the RETROscript kit (Ambion). mRNA quantification was performed using an ABI Prism 7900 sequence detector and the SYBR green detection method (Applied Biosystems). *c-Jun* mRNA levels were normalized to the *rp49* “housekeeping” gene as control (expression level did not vary:  $P = 0.64$  for each test) and those of *Uvop*,

*Gβ<sub>e</sub>*, *trp*, and *TpnCI* were normalized to the external control *rcp1* (expression level did not vary; *P* = 0.11 for each test). A list of primers is given in Table S5.

**Measurements of Mitochondrial Enzyme Activities.** Activity of NADH:ubiquinone oxidoreductase was assayed as previously described (3, 4). Briefly, brain mitochondria were lysed by freeze-thawing 3 times in hypotonic buffer (25 mM KH<sub>2</sub>PO<sub>4</sub>, pH 7.2, 5 mM MgCl<sub>2</sub>) and added to an assay buffer consisting of 65 μM ubiquinone<sub>1</sub>, 130 μM NADH, 2 μg/mL antimycin A, and 2.5 mg/mL BSA in the presence or absence of rotenone. Oxidation of NADH was measured at 340 nm for 5 min at 30 °C by using a SpectraMax M2 microplate reader (Molecular Devices), after which 5 μg/mL rotenone was added to the reaction. Activity was then measured for another 5 min and the difference in rate before and after treatment with rotenone was used to determine complex I activity. The molar absorbance coefficient used for NADH was 6.22 mM<sup>-1</sup>cm<sup>-1</sup>.

Complex IV activity was measured by using a Cytochrome *c* Oxidase Assay kit (Sigma) as per manufacturer instructions. The decrease in absorption at 550 nm, representing oxidation of ferrocytochrome *c*, was monitored over time on a SpectroMax M2 microplate reader (Molecular Devices) at room temperature. Activity was then calculated by using the following formula: ( $\Delta$ absorbance<sub>550 nm</sub>/min × 28.8)/40 × 21.84, where 21.84 represents the  $\Delta\epsilon^{mM}$  between ferrocytochrome *c* and ferricytochrome *c* at 550 nm, and 28.8 represents the dilution factor multiplied by the total reaction volume.

Complex V (ATP synthase) activity was determined by measuring the decrease in NADH absorption at 340 nm in the presence or absence of 2 μg/mL oligomycin, a specific inhibitor of the F<sub>1</sub>F<sub>0</sub> complex of ATPase, at 30 °C as previously described (5). Mitochondria were freeze-thawed as before and added to an assay medium consisting of 4 mM ATP, 25 mM Tris-Cl (pH 7.4), 25 mM KCl, 5 mM MgCl<sub>2</sub>, 200 μM NADH, 1.5 mM phosphoenolpyruvate, 5 units lactate dehydrogenase, 3 units pyruvate kinase, and 2.5 μM rotenone.

In addition, assays of ATP production in the presence or absence of 5 μg/mL rotenone (complex I inhibitor), 0.25 mM KCl (complex IV inhibitor), or 2 μg/mL oligomycin (complex V inhibitor) were also performed by using an ATPlite Luminescence Assay System (Perkin-Elmer). Freeze-thawed mitochondria were prepared as above and the lysates incubated at 30 °C in a reaction buffer containing 65 μM ubiquinone<sub>1</sub>, 130 μM NADH, and 2.5 mg/mL BSA. Aliquots were removed every minute and processed according to manufacturer instructions, and luminescence was detected by using a SpectroMax M2 microplate reader.

All measurements were corrected for background and crude

protein concentration and analyzed by using 1-way ANOVA with Tukey posthoc testing.

**Functional analysis.** The list of GO categories from Fig. 2 is shown below:

1. Multicellular organismal process.
2. Response to stimulus.
3. Metabolic process.
4. Biological regulation.
5. Binding.
6. Electron carrier activity.
7. Catalytic activity.
8. Structural molecule activity.
9. Transmembrane transporter activity.
10. System process.
11. Detection of stimulus.
12. Cellular metabolic process.
13. Oxidation reduction.
14. Regulation of biological process.
15. Protein binding.
16. Isomerase activity.
17. Oxidoreductase activity.
18. Structural constituent of ribosome.
19. Substrate-specific transmembrane transporter activity.
20. Neurological system process.
21. Detection of external stimulus.
22. Alcohol metabolic process.
23. Regulation of cellular process.
24. Intramolecular lyase activity.
25. Ion transmembrane transporter activity.
26. Sensory perception.
27. Alcohol biosynthetic process.
28. Regulation of cell cycle.
29. Inositol-3-phosphate synthase activity.
30. Cation transmembrane transporter activity.
31. Sensory perception of light stimulus.
32. Polyol biosynthetic process.
33. Regulation of S phase.
34. Inorganic cation transmembrane transporter activity.
35. Visual perception.
36. Inositol biosynthetic process.
37. Regulation of S phase of mitotic cell cycle.
38. Monovalent inorganic cation transmembrane transporter activity.
39. Positive regulation of S phase of mitotic cell cycle.
40. Hydrogen ion transmembrane transporter activity.

1. Benson G (1999) Tandem repeats finder: A program to analyze DNA sequences. *Nucleic Acids Res* 27:573–580.
2. Alaux C, et al. (2009) Regulation of brain gene expression in honey bees by brood pheromone. *Genes Brain Behav* 8:309–319.
3. Birch-Machin MA, Turnbull DM (2001) Assaying mitochondrial respiratory complex activity in mitochondria isolated from human cells and tissues. *Methods Cell Biol* 65:97–117.
4. Tieu K, et al. (2003) D-beta-hydroxybutyrate rescues mitochondrial respiration and mitigates features of Parkinson disease. *J Clin Invest* 112:892–901.

5. Bosetti F, Yu G, Zucchi R, Ronca-Testoni S, Solaini G (2000) Myocardial ischemic preconditioning and mitochondrial F1F0-ATPase activity. *Mol Cell Biochem* 215:31–37.
6. Hunt GJ, et al. (2007) Behavioral genomics of honeybee foraging and nest defense. *Naturwissenschaften* 94:247–267.
7. Kanehisa M, Goto S (2000) KEGG: Kyoto encyclopedia of genes and genomes. *Nucleic Acids Res* 28:27–30.





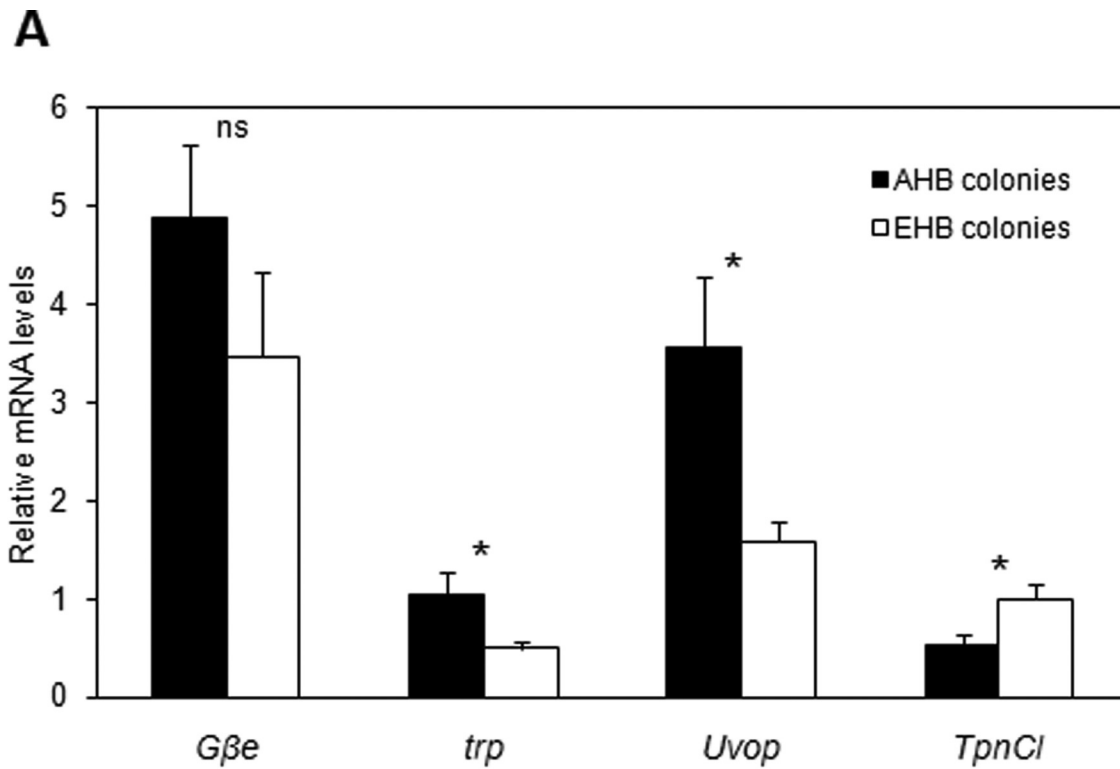

**B**

| Honeybee annotations | Gene name    | Microarrays (AHB/EHB) | qRT-PCR (AHB/EHB) |
|----------------------|--------------|-----------------------|-------------------|
| GB10545              | <i>Gβe</i>   | 1.5                   | 1.4               |
| GB16264              | <i>trp</i>   | 1.4                   | 2.1               |
| GB18171              | <i>Uvop</i>  | 1.4                   | 2.2               |
| GB10545              | <i>TpnCl</i> | 0.8                   | 0.5               |

**Fig. 53.** Validation of microarray results with real-time qRT-PCR. (A) Brain expression levels of four genes identified from microarray analysis as showing different expression levels between AHB vs. EHB. Data normalized to expression levels of *rcp1*. (B) Ratio of mean expression levels (AHB/EHB) from array and qRT-PCR results are shown. qRT-PCR samples were from independent biological replicates, not used for microarray analysis. Means  $\pm$  SE shown. Significant differences were determined by using a 1-tailed permutation test (\*,  $P < 0.05$ ).

**Table S1. Aggression-related brain gene regulation in honey bees: Number of genes overlapping between gene sets regardless of direction**

| Experiment      | Old bee  |              |           |                | AHB guard |              |           |                | AHB soldier |              |           |                | AHB forager |              |           |                |
|-----------------|----------|--------------|-----------|----------------|-----------|--------------|-----------|----------------|-------------|--------------|-----------|----------------|-------------|--------------|-----------|----------------|
|                 | Expected | Observed no. | <i>RF</i> | <i>P</i> value | Expected  | Observed no. | <i>RF</i> | <i>P</i> value | Expected    | Observed no. | <i>RF</i> | <i>P</i> value | Expected    | Observed no. | <i>RF</i> | <i>P</i> value |
| Alarm pheromone | 55.3     | 151          | 2.7       | <0.0001        | 10        | 24           | 2.4       | <0.0001        | 21.8        | 55           | 2.5       | <0.0001        | 2.3         | 7            | 3         | <0.008         |
| Old bee         |          |              |           |                | 28.8      | 54           | 1.9       | <0.0001        | 63.7        | 147          | 2.3       | <0.0001        | 6.8         | 21           | 8.1       | <0.0001        |
| AHB guard (I)   |          |              |           |                |           |              |           |                | 11.6        | 81           | 7         | <0.0001        | 1.2         | 24           | 19.5      | <0.0001        |
| AHB soldier (I) |          |              |           |                |           |              |           |                |             |              |           |                | 2.7         | 29           | 10.7      | <0.0001        |
| Alarm pheromone | 55.3     | 151          | 2.7       | <0.0001        | 19.8      | 63           | 3.2       | <0.0001        | 33.6        | 64           | 1.9       | <0.0001        | 13.9        | 27           | 1.9       | <0.0001        |
| Old bee         |          |              |           |                | 57.1      | 128          | 2.2       | <0.0001        | 98.3        | 195          | 2         | <0.0001        | 40.3        | 85           | 2.1       | <0.0001        |
| AHB guard (C)   |          |              |           |                |           |              |           |                | 35.4        | 155          | 4.4       | <0.0001        | 14.6        | 91           | 6.2       | <0.0001        |
| AHB soldier (C) |          |              |           |                |           |              |           |                |             |              |           |                | 24.9        | 106          | 4.3       | <0.0001        |

Data are from the following: Experiment 1, AHB vs. EHB (guards, soldiers, and foragers); Experiment 2, alarm pheromone induced; and Experiment 3, old vs. young bees. Expected, the number of genes expected to overlap in all three experiments by chance alone; *RF*, representation factor; I, individual genotype; C, colony genotype. The statistical significance of the overlap between two lists was determined using an exact hypergeometric test and an extended version of the hypergeometric test for the overlap between three lists (see [SI Text](#)).

**Table S2. Correlation analysis for genes differentially expressed as a function of genotype, alarm pheromone exposure, and age**

| Experiment      | Alarm pheromone |                | Old bee  |                |
|-----------------|-----------------|----------------|----------|----------------|
|                 | <i>r</i>        | <i>P</i> value | <i>r</i> | <i>P</i> value |
| AHB Guard (I)   | 0.139           | 0.004          | 0.062    | 0.02           |
| AHB Soldier (I) | 0.229           | <0.001         | 0.277    | <0.001         |
| AHB Forager (I) | 0.161           | <0.001         | 0.302    | <0.001         |
| AHB Guard (C)   | 0.207           | <0.001         | 0.059    | 0.026          |
| AHB Soldier (C) | 0.189           | <0.001         | 0.349    | <0.001         |
| AHB Forager (C) | 0.357           | <0.001         | 0.15     | <0.001         |
| Alarm pheromone | —               | —              | 0.429    | <0.001         |
| Old bee         | 0.65            | <0.001         | —        | —              |

Correlations were performed on expression values for genes regulated by alarm pheromone or differentially expressed between old and young individuals and the expression values of the same genes from the other lists that are listed. Log<sub>2</sub>-transformed ratios were used. I, individual genotype; C, colony genotype.

**Table S3. Genes regulated by alarm pheromone and/or differentially expressed between AHB/EHB, and found in independently derived aggression quantitative trait loci (6)**

| Bee genes                           | Fly orthologs    | Molecular function                                                  | Biological process                                                                  |
|-------------------------------------|------------------|---------------------------------------------------------------------|-------------------------------------------------------------------------------------|
| <b>Alarm pheromone</b>              |                  |                                                                     |                                                                                     |
| GB10390 ↓                           | <i>Pros25</i>    | Endopeptidase activity                                              | ATP-dependent proteolysis; cell proliferation                                       |
| GB18971 ↑                           | <i>l(1)G0232</i> | Rhodopsin-like receptor activity                                    | G-protein-coupled receptor protein signaling pathway                                |
| GB12020 ↓                           | <i>ubl</i>       | Unknown                                                             | Protein modification process                                                        |
| GB12504 ↑                           | <i>CkIIβ</i>     | Casein kinase activity                                              | Mushroom body development; circadian rhythm; signal transduction                    |
| GB15016 ↑                           | <i>Hsc70-3</i>   | ATPase activity                                                     | Sleep; response to heat; defense response; protein folding; RNA interference        |
| GB14502 ↑                           | <i>MED22</i>     | RNA polymerase II transcription mediator activity                   | Regulation of transcription from RNA polymerase II promoter                         |
| GB13698 ↓                           | <i>Psf2</i>      | Transcription elongation regulator activity                         | Positive regulation of S phase of mitotic cell cycle                                |
| <b>AHB/EHB, individual genotype</b> |                  |                                                                     |                                                                                     |
| <b>Guard</b>                        |                  |                                                                     |                                                                                     |
| GB19009 ↓                           | —                | —                                                                   | —                                                                                   |
| GB16258 ↑                           | —                | —                                                                   | —                                                                                   |
| <b>Soldier</b>                      |                  |                                                                     |                                                                                     |
| GB19009 ↓                           | —                | —                                                                   | —                                                                                   |
| GB19676 ↑                           | <i>CG8165</i>    | Regulation of transcription from RNA polymerase II promoter         | Transcription from RNA polymerase II promoter                                       |
| GB15582 ↑                           | <i>14-3-3ε</i>   | Regulation of transcription, protein complexes, protein trafficking | Response to external stimulus; nonassociative learning                              |
| <b>AHB/EHB, colony genotype</b>     |                  |                                                                     |                                                                                     |
| <b>Guard</b>                        |                  |                                                                     |                                                                                     |
| GB14502 ↓                           | <i>MED22</i>     | RNA polymerase II transcription mediator activity                   | Regulation of transcription from RNA polymerase II promoter                         |
| GB11198 ↓                           | <i>CG34347</i>   | Actin binding; structural constituent of cytoskeleton               | Cytoskeleton organization and biogenesis                                            |
| <b>Soldier</b>                      |                  |                                                                     |                                                                                     |
| GB14824 ↑                           | <i>CG7675</i>    | Oxidoreductase activity, acting on CH-OH group of donors            | Metabolic process                                                                   |
| GB18618 ↑                           | <i>htt</i>       | Microtubule binding; protein binding                                | Axon cargo transport                                                                |
| GB19676 ↑                           | <i>CG8165</i>    | Regulation of transcription from RNA polymerase II promoter         | Transcription from RNA polymerase II promoter                                       |
| GB19319 ↓                           | <i>Rpl12</i>     | Zinc ion binding; transcription regulator activity                  | Transcription from RNA polymerase I promoter                                        |
| GB17741 ↓                           | <i>CG7849</i>    | Unknown                                                             | Unknown                                                                             |
| GB19681 ↓                           | <i>Ctr1A</i>     | Copper ion transmembrane transporter activity                       | Copper ion transport                                                                |
| <b>Forager</b>                      |                  |                                                                     |                                                                                     |
| GB14824 ↓                           | <i>CG7675</i>    | Oxidoreductase activity, acting on CH-OH group of donors            | Metabolic process                                                                   |
| GB18557 ↑                           | <i>α-Spec</i>    | Cytoskeletal protein binding                                        | Synaptic transmission; regulation of cellular component organization and biogenesis |

Arrows indicates up- or down-regulated by alarm pheromone and in AHB vs. EHB bees. Known functions of orthologs of these genes are shown. Quantitative trait loci were derived in a separate study based on an assay that measured propensity to sting in response to a disturbance to the colony (in the field), and involved different bees derived from crosses between AHB and EHB (6). —, unknown.



**Table S4. Genes that were up- and down-regulated in all three experiments, i.e., responsive to heredity, alarm pheromone, and age, are shown with their fly and human orthologs**

| Bee oligo      | Bee gene | Fly orthologs       | Human orthologs                  |
|----------------|----------|---------------------|----------------------------------|
| Up-regulated   |          |                     |                                  |
| AM00762        | —        | —                   | —                                |
| AM01806        | —        | —                   | —                                |
| AM02192        | —        | —                   | —                                |
| AM02336        | —        | —                   | —                                |
| AM02847        | GB10220  | —                   | —                                |
| AM02986        | GB10356  | —                   | —                                |
| AM03461        | GB10836  | <i>Hsc70Cb</i>      | <i>HSPA4 (hsp70)</i>             |
| AM03846        | GB11223  | <i>His3:CG33803</i> | <i>HIST2H3</i>                   |
| AM04192        | GB11572  | <i>Inos</i>         | <i>AC008397.7 (MIP synthase)</i> |
| AM04834        | GB12215  | <i>Droj2</i>        | <i>DNAJA4</i>                    |
| AM05318        | GB30506  | <i>Gp93</i>         | <i>HSP90B1</i>                   |
| AM05381        | GB12766  | <i>Arr2</i>         | —                                |
| AM06103        | GB13501  | —                   | —                                |
| AM06766        | GB14166  | —                   | —                                |
| AM08435        | GB15853  | <i>Kap-α1</i>       | <i>KPNA</i>                      |
| AM08741        | GB16163  | —                   | —                                |
| AM09086        | GB16507  | <i>CG1600</i>       | —                                |
| AM10198        | GB17624  | <i>CHORD</i>        | <i>CHORDC1</i>                   |
| AM10664        | GB18094  | <i>tj</i>           | <i>MAF</i>                       |
| AM12432        | GB19885  | <i>CG1516</i>       | <i>PC</i>                        |
| AM12790*       | GB11487  | <i>moody</i>        | <i>MTNR1a</i>                    |
| Down-regulated |          |                     |                                  |
| AM02193        | —        | —                   | —                                |
| AM02582        | —        | —                   | —                                |
| AM03140        | GB10513  | <i>CG14286</i>      | <i>C8orf33</i>                   |
| AM03851        | GB11228  | <i>His3.3A</i>      | <i>H3F3B</i>                     |
| AM06007        | GB13404  | <i>Ts</i>           | <i>TYMS</i>                      |
| AM06580        | GB13982  | <i>Faa</i>          | <i>FAH</i>                       |
| AM07997*       | GB15409  | <i>Cyp6 g1</i>      | —                                |
| AM08023        | GB15436  | <i>CG10674</i>      | <i>C19orf56</i>                  |
| AM08856        | GB16276  | <i>SmB</i>          | <i>SNRPB</i>                     |
| AM10511        | GB17938  | <i>CG1756</i>       | —                                |
| AM10649        | GB18078  | <i>CG9646</i>       | <i>C22orf9</i>                   |
| AM10750        | GB18183  | —                   | —                                |
| AM11126        | GB18566  | —                   | —                                |
| AM11255        | GB18694  | —                   | —                                |
| AM11556        | GB19000  | <i>Tim9a</i>        | <i>TIMM9</i>                     |
| AM12010        | GB19459  | <i>Psf1</i>         | <i>GIN51</i>                     |
| AM12536        | GB19989  | <i>CG4875</i>       | <i>AC068533.6 (RPC9)</i>         |

Asterisks indicate genes that were regulated at a slightly less stringent threshold in one experiment (*moody* was up-regulated in AHB foragers at FDR = 0.097 and *Cyp6 g1* was down-regulated by alarm pheromone at FDR = 0.057). —, unknown.

Table S5. Oxidative phosphorylation pathway downregulated in aggressive bees

|                                              | Bee gene                             | Fly orthologs                             | Alarm Pheromone | Old Bee | AHB Soldier (I) | AHB Soldier (C) |
|----------------------------------------------|--------------------------------------|-------------------------------------------|-----------------|---------|-----------------|-----------------|
| Complex I<br>NADH-coenzyme Q oxidoreductase  | GB15948                              | CG10320                                   | ■               |         | ■               | ■               |
|                                              | GB18920                              | Pdsw                                      | ■               |         | ■               |                 |
|                                              | GB10916                              | CG9306                                    | ■               |         | ■               |                 |
|                                              | GB10474                              | CG12400                                   |                 |         | ■               | ■               |
|                                              | GB13526                              | CG3621                                    |                 | ■       | ■               | ■               |
|                                              | GB10859                              | CG2014                                    |                 |         |                 | ■               |
|                                              | GB15438                              | CG15434                                   |                 |         |                 | ■               |
|                                              | GB17095                              | CG9140                                    |                 | ■       |                 |                 |
|                                              | GB16917                              | CG12203                                   |                 | ■       |                 |                 |
|                                              | GB10406                              | CG6020                                    |                 | ■       |                 |                 |
| GB15102                                      | mitochondrial acyl carrier protein 1 |                                           | ■               |         |                 |                 |
| Complex II<br>Succinate-Q oxidoreductase     | GB12875                              | CG6666                                    |                 | ■       |                 |                 |
| Complex III<br>Q-cytochrome c oxidoreductase | GB12164                              | CG30354                                   | ■               |         |                 |                 |
|                                              | GB14417                              | CG14482                                   |                 | ■       |                 | ■               |
|                                              | GB10344                              | Oxen                                      |                 |         |                 | ■               |
|                                              | GB12510                              | CG4769                                    |                 | ■       |                 |                 |
| Complex IV<br>Cytochrome c oxidase           | GB18028                              | CG14235                                   | ■               |         |                 |                 |
|                                              | GB15238                              | CG9065                                    |                 |         | ■               | ■               |
|                                              | GB30388                              | cyclope                                   |                 |         | ■               | ■               |
|                                              | GB20012                              | CG10664                                   |                 | ■       | ■               |                 |
|                                              | GB15816                              | Cytochrome c oxidase subunit Va           |                 |         | ■               |                 |
|                                              | GB17614                              | CG2249                                    |                 | ■       |                 |                 |
| Complex V<br>ATP synthase                    | GB16494                              | ATPase coupling factor 6                  | ■               |         | ■               | ■               |
|                                              | GB18417                              | CG4692                                    | ■               |         |                 |                 |
|                                              | GB15629                              | Oligomycin sensitivity-conferring protein |                 | ■       | ■               |                 |
|                                              | GB10989*                             | Vha68-2                                   |                 |         |                 | ■               |
|                                              | GB16751                              | lethal (2) 06225                          |                 |         |                 | ■               |
|                                              | GB14791                              | bellwether                                |                 | ■       |                 |                 |
|                                              | GB15291                              | ATP synthase-γ chain                      |                 | ■       |                 |                 |

This was performed by using the DAVID annotation tool (<http://david.abcc.ncifcrf.gov/>) that presents information on molecular pathways from the Kyoto Encyclopedia of Genes and Genomes (KEGG) pathways (<http://www.genome.jp/kegg/>) (7). Asterisk indicates up-regulation. I, individual genotype; C, colony genotype. Colors indicate the three different experiments.
